# Supplementary material for: Evolutionary history of the extant amphioxus lineage with shallow-branching diversification
Source: PubMed Central journal article supplement (PMC5430900; doi:10.1038/s41598-017-00786-5), 2017-04-25
Supplement: 41598_2017_786_MOESM1_ESM.pdf [file 41598_2017_786_MOESM1_ESM.pdf]

## Supplementary information

“Evolutionary history of the extant amphioxus lineage with shallow-branching diversification” by Takeshi Igawa, Masafumi Nozawa, Daichi G. Suzuki, James D. Reimer, Arseniy R. Morov, Yiquan Wang, Yasuhisa Henmi, and Kinya Yasui

Table S1. Primers and their combinations for amplification of mitochondrial genomes.

Table S2. Samples and their mitochondrial genomes used in this study.

Figure S1. Map of collecting localities for newly collected *Asymmetron* and *Epigonichthys* specimens.

Figure S2. Divergence time estimates based on mitogenomic nucleotide sequences in amphioxus lineage with geological calibration points.

Table S1. Primer and their combinations for amplification of mitochondrial genomes

| Primer                           | Sequence (5' to 3')                          | Reference                                    |
|----------------------------------|----------------------------------------------|----------------------------------------------|
| AmphL109                         | ATTCGNGCNGAAYTNTCNCAGCC                      | ref. 1                                       |
| AmphH1325                        | TCNGAATAYCGNCGWGGTAINCC                      | ref. 1                                       |
| AmphLAL1076-cox1                 | CTGTAGGTGGGTTAACAGGAATTGTATTAGC              | ref. 2                                       |
| EmLAL1076-cox1                   | CCGTGGGTGGTTAACGGGAATTGTATTAGC               | this study                                   |
| EcLAL1076-cox1                   | CTGTGGGGGGTTAACTGGAATCGTGCTAGC               | this study                                   |
| AmphLAH12317-rrnL                | CTAGGAATCTTGATCCAACATCGAGGTCGC               | ref. 2                                       |
| AmphLAL11918-rrnL                | GACTGTGCAAAGGTAGCATAATCACTTGCCC              | ref. 2                                       |
| AmphLAH916-cox1                  | CCTGTTGGTACAGCAATTACTATAGTAGCAGC             | ref. 2                                       |
| AILAH916-cox1                    | CCTGTGGGACGGCAATAACTATAGTTGCAGC              | this study                                   |
| EcLAH916-cox1                    | CCGGTAGGTACAGCAATTACCATCGTAGCCGC             | this study                                   |
| Species                          | Fragment 1 ( <i>coxI</i> - <i>12S rRNA</i> ) | Fragment 2 ( <i>12S rRNA</i> - <i>coxI</i> ) |
| <i>Asymmetron lucayanum</i>      | AmphLAL1076-cox1 / AmphLAH12317-rrnL         | AmphLAL11918-rrnL / AILAH916-cox1            |
| <i>Epigonichthys maldivensis</i> | EmLAL1076-cox1 / AmphLAH12317-rrnL           | AmphLAL11918-rrnL / AmphLAH916-cox1          |
| <i>Epigonichthys cultellus</i>   | EcLAL1076-cox1 / AmphLAH12317-rrnL           | AmphLAL11918-rrnL / EcLAH916-cox1            |

Table S2. Samples and accession numbers of mitochondrial genomes used in this study

| Species                              | Locality                              | Accession number | Reference  |
|--------------------------------------|---------------------------------------|------------------|------------|
| <i>Asymmetron inferum</i>            | off Cape Nomamisaki, Kagoshima, Japan | AP009352         | ref. 2     |
| formerly <i>Asymmetron lucayanum</i> | off Kuroshima Island, Okinawa, Japan  | AB110092         | ref. 3     |
|                                      | Castle Harbour, Bamuda                | AP009354         | ref. 2     |
|                                      | Nanwan Bay, Taiwan                    | AP015017         | this study |
|                                      | Nanwan Bay, Taiwan                    | AP015018         | this study |
|                                      | Nanwan Bay, Taiwan                    | AP015019         | this study |
|                                      | Nanwan Bay, Taiwan                    | AP015020         | this study |
|                                      | Nanwan Bay, Taiwan                    | AP015021         | this study |
|                                      | Nanwan Bay, Taiwan                    | AP015022         | this study |
|                                      | Bimini Lagoon, the Bahamas            | AP015023         | this study |
| <i>Epigonichthys cultellus</i>       | off eastern Guandong, China           | KC896827         | ref. 4     |
|                                      | Hakata Bay, Fukuoka, Japan            | AP015024         | this study |
| <i>Epigonichthys maldivensis</i>     | off Kuroshima Island, Okinawa, Japan  | AB110093         | ref. 3     |
|                                      | Nanwan Bay, Taiwan                    | AP015025         | this study |
|                                      | Nanwan Bay, Taiwan                    | AP015026         | this study |
|                                      | Nanwan Bay, Taiwan                    | AP015027         | this study |
|                                      | Nanwan Bay, Taiwan                    | AP015028         | this study |
| <i>Branchiostoma belcheri</i>        | Xiamen waters, China                  | AY932825         | ref. 5     |
| <i>Branchiostoma japonicum</i>       | Hakata Bay, Fukuoka, Japan            | AB083383         | ref. 6     |
| <i>Branchiostoma lanceolatum</i>     | Helgoland, Germany                    | AB194383         | ref. 3     |
| <i>Branchiostoma floridae</i>        | Tampa Bay, USA                        | AB478574         | ref. 6     |

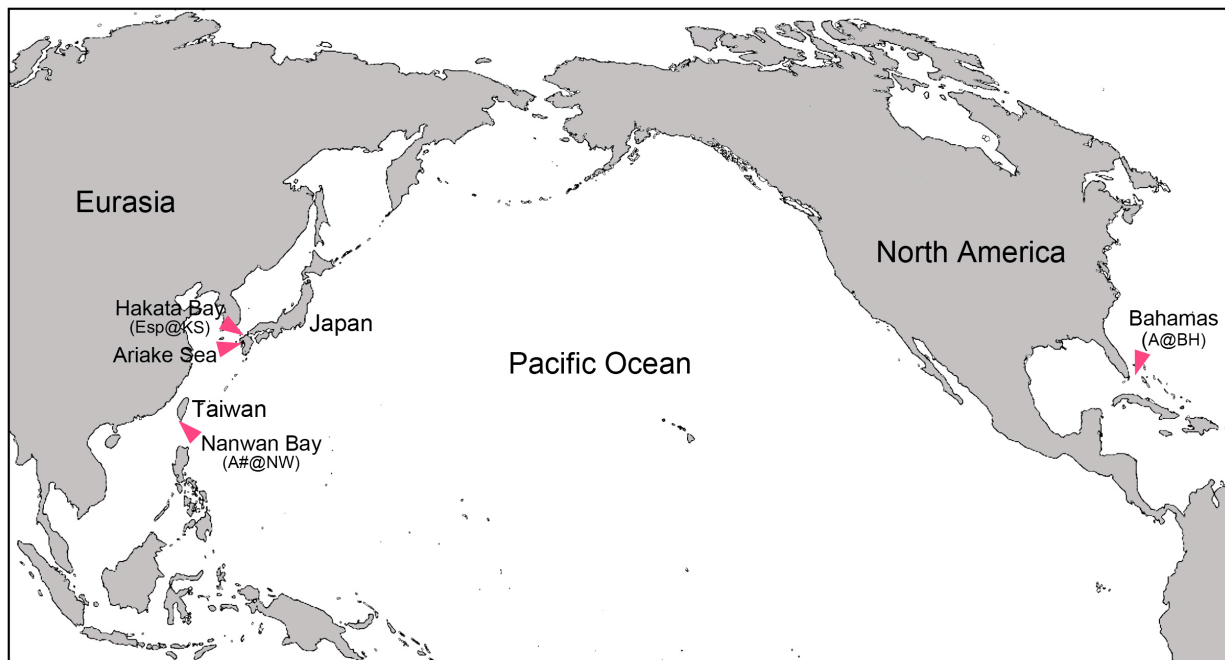

Figure S1. Map of collecting localities for newly collected *Asymmetron* and *Epigonichthys* specimens. The map was drawn based on free online map ([http://gpscycling.net/fland/map/pj/07\\_ecker.gif](http://gpscycling.net/fland/map/pj/07_ecker.gif)) with Adobe Photoshop ver. 13.0.6 x64 and Illustrator ver. 11.0.4.

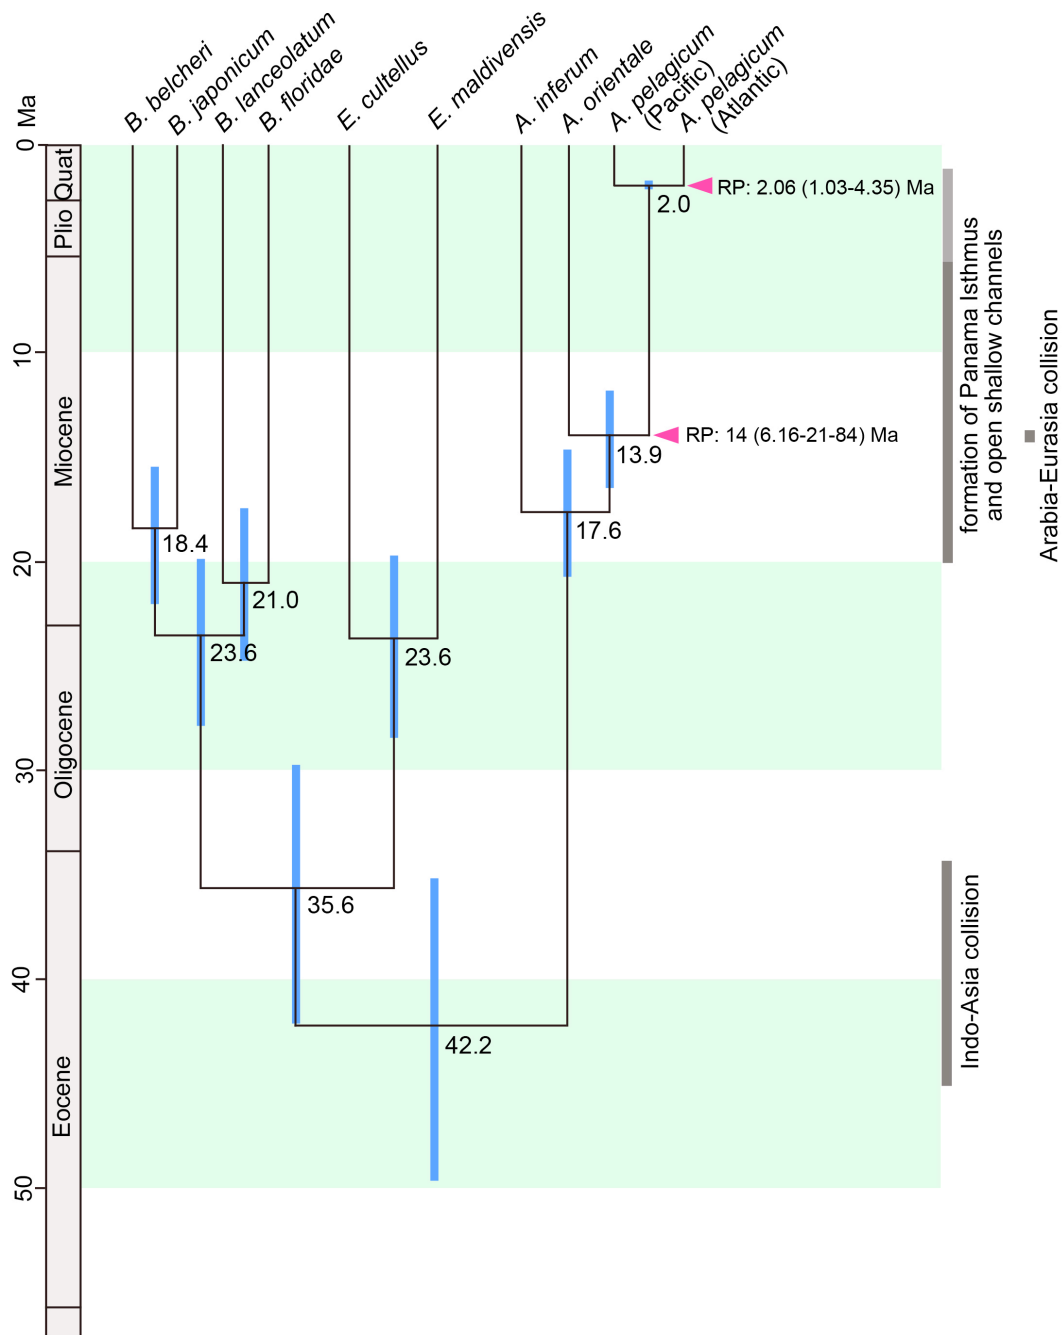

**Figure S2. Divergence time estimates based on mitogenomic nucleotide sequences in amphioxus lineage with geological calibration points.** BEAST 1.8.2 with the random local clock model was used with two calibration points (completion of Panama Isthmus at  $2.06 \pm 0.1$  Ma<sup>7</sup> and Arabia-Eurasia collision at  $14 \pm 4.0$  Ma<sup>8</sup>). Numerals at nodes denote estimated split time in Ma. Blue bars denote 95% confidence interval. The age of the Indo-Asia collision is from refs.<sup>9,10</sup>.

## References

1. Kon, T., Nohara, M., Nishida, M., Sterrer, W. & Nishikawa, T. Hidden ancient diversification in the circumtropical lancelet *Asymmetron lucayanum* complex. *Mar Biol* **149**, 875–883 (2006).
2. Kon, T. *et al.* Phylogenetic position of a whale-fall lancelet (Cephalochordata) inferred from whole mitochondrial genome sequences. *BMC Evol Biol* **7**, 127 (2007).
3. Nohara, M., Nishida, M., Miya, M. & Nishikawa, T. Evolution of the mitochondrial genome in cephalochordata as inferred from complete nucleotide sequences from two *Epigonichthys* species. *J Mol Evol* **60**, 526–37 (2005).
4. Li, W.-Y., Fang, S.-H. & Wang, Y.-Q. Complete Mitochondrial Genome of *Epigonichthys cultellus* (Cephalochordata: Branchiostomatidae). *Zool Sci* **31**, 766–72 (2014).
5. Zhong, J. *et al.* Complete mitochondrial genomes defining two distinct lancelet species in the West Pacific Ocean. *Mar Biol Res* **5**, 278–285 (2009).
6. Takada, Y. & Imai, T. Comparative genomics of mitochondrial DNA in *Branchiostoma* species. *J Anal Bio-Science* **32**, 167–180 (2009).
7. Bacon, C. D. *et al.* Biological evidence supports an early and complex emergence of the Isthmus of Panama. *Proc Natl Acad Sci* **112**, 6110–6115 (2015).
8. Hamon, N., Sepulchre, P., Lefebvre, V. & Ramstein, G. The role of eastern tethys seaway closure in the middle miocene climatic transition (ca. 14 Ma). *Clim Past* **9**, 2687–2702 (2013).
9. Aitchison, J. C., Ali, J. R. & Davis, A. M. When and where did India and Asia collide? *J Geophys Res* **112**, B05423 (2007).
10. Ali, J. R. & Aitchison, J. C. Gondwana to Asia: Plate tectonics, paleogeography and the biological connectivity of the Indian sub-continent from the Middle Jurassic through latest Eocene (166-35 Ma). *Earth-Science Rev* **88**, 145–166 (2008).
